# Supplementary material for: Microfluidic contactless conductivity cytometer for electrical cell sensing and counting
Source: Royal Society of Chemistry journal article supplement (doi:10.1039/c5ra08371k), 2015-01-01
Supplement: c5ra08371k1.pdf [file c5ra08371k1.pdf]

## Supplementary Material

# **Microfluidic contactless conductivity cytometer for the electrical cell sensing and counting**

Duanping Sun, Jing Lu, Zuanguang Chen\*

*School of Pharmaceutical Sciences, Sun Yat-Sen University, Guangzhou 510006, China*

\* Corresponding author. Tel.: +86 20 39943044; fax: +86 20 39943071.

E-mail address: [chenzg@mail.sysu.edu.cn](mailto:chenzg@mail.sysu.edu.cn) (Zuan-Guang Chen)

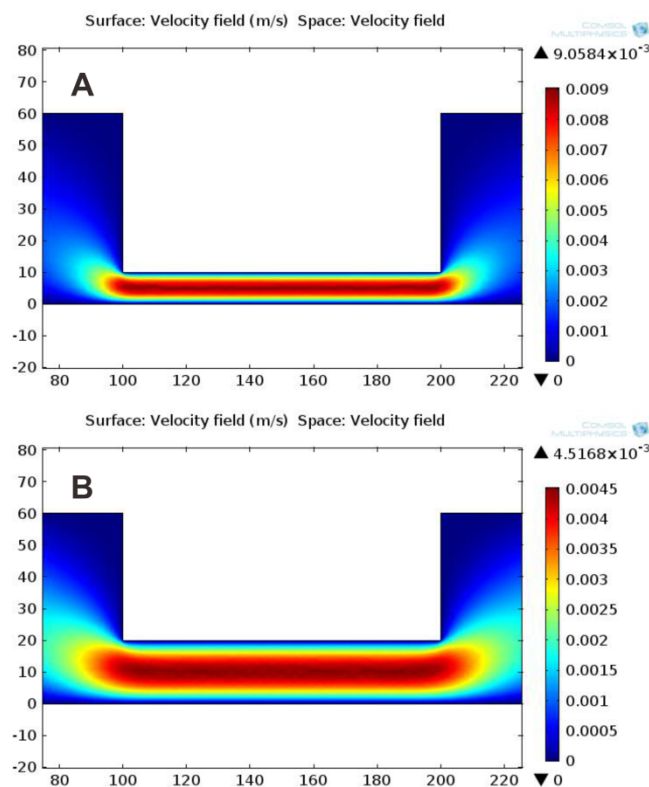

**Fig. S1** Simulation results of the fluid flow using COMSOL Multiphysics in the designed microfluidic chip. Color bar is for the magnitude of the velocity. (A) The detection channel is 10  $\mu\text{m}$  deep. (B) The detection channel is 20  $\mu\text{m}$  deep.

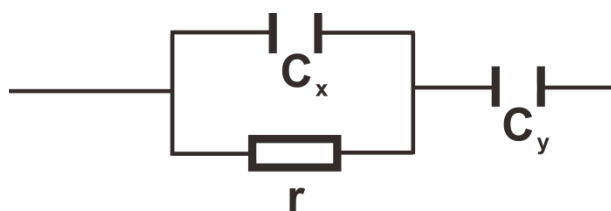

**Fig. S2** The simplest equivalent electrical circuit of the C4D system.  $r$  and  $C_x$  are resistance and capacitance of the solution and cell in the channel between two electrodes, respectively;  $C_y$  is the total capacitance between electrodes and solutions.

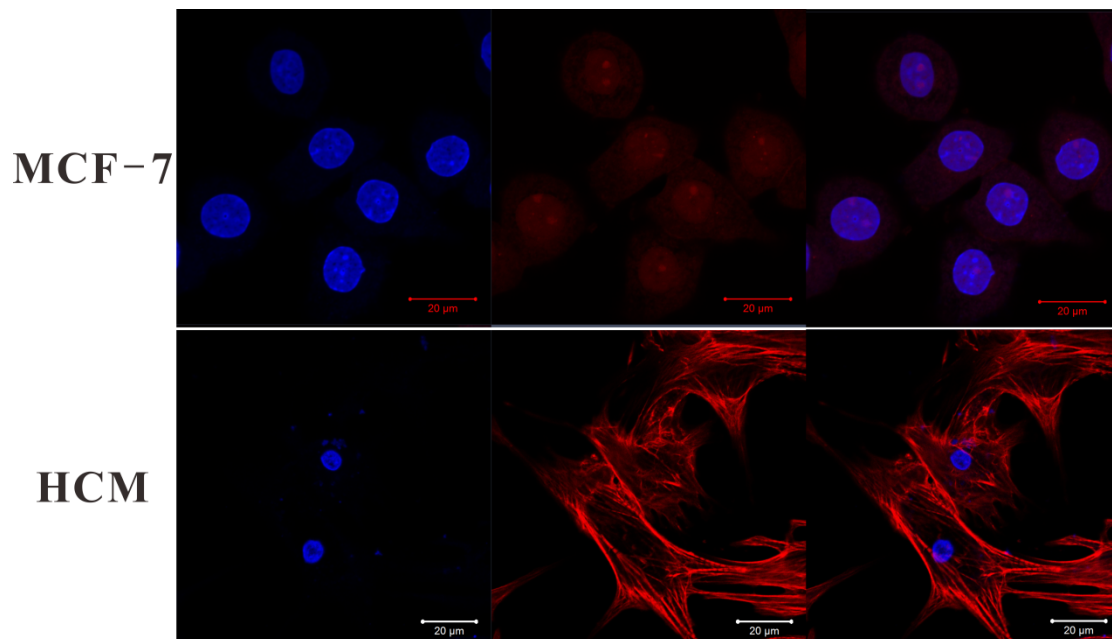

**Fig. S3** The fluorescence pictures of the MCF-7 and HCM cells. MCF-7 and HCM cells were stained with rhodamine-phalloidin to measure the cell surface area.
